# Supplementary material
Source: PubMed Central journal article supplement (PMC2709374)

Supplementary Table 1

Table S1. Amplification primers used to generate cDNA probes for Northern blot analysis.

| Gene           | Primers                                                  |
|----------------|----------------------------------------------------------|
| MN1            | F: CTTTAACGAAGCCGGACTGA<br>R: GCCAAACCTCTCGAAGAACA       |
| 24-hydroxylase | F: CAAGGTCCGTGACATCCAAG<br>R: GATGCAGGGCTTGACTGATT       |
| VDR            | F: CTGGTGACTTTGACCGGAAT<br>R: TTATGAGGGGTTTCGATCAGC;     |
| OPG            | F: ATTGAATGGACAACCCAGGA<br>R: ACGCTGCTTTCACAGAGGTC       |
| RANKL          | F: TATACACAACCTGTACAGGCTC<br>R: CCATGAGCCTTCCATCATAGCTGG |
| ALP            | F: GGGACGAATCTCAGGGTACA<br>R: CTGGCCTTCTCATCCAGTTC       |
| Osteocalcin    | F: GAACAGACTCCGGCGCTA<br>R: AGGGAGGATCAAGTCCCG           |
| BSP2           | F: AGTACCGGCCACGCTACTTT<br>R:ACGGTGCTGCTTTTTCTGAT        |
| M-CSF          | F: CTGCTGCTGGTCTGTCTCCT<br>R: GTGAGTCTGTCCCCATGGTT       |
| Cyclophilin B  | F: AGCGCAATATGAAGGTGCTC<br>R: GCACAGAACCTTGTGACTGG       |
| 18S RNA        | F: CGGGTCATAAGCTTCGTT<br>R: CCGCAGGTTACCTACGG            |

Supplementary Table 2

Table S2. MicroCT Analysis of E18.5 Tibias from WT and MN1KO mice

|                                  | MN1-WT        | MNI-KO        |
|----------------------------------|---------------|---------------|
| Tibia, Whole                     |               |               |
| TV Density (mg/cm <sup>3</sup> ) | 157.0 ± 7.1   | 146.2 ± 8.0   |
| BV Density (mg/cm <sup>3</sup> ) | 701.3 ± 33.8  | 705.8 ± 31.7  |
| TV (mm <sup>3</sup> )            | 0.576 ± 0.040 | 0.573 ± .030  |
| BV (mm <sup>3</sup> )            | 0.156 ± 0.012 | 0.148 ± 0.008 |
| TV/BV                            | 0.271 ± 0.011 | 0.259 ± 0.011 |
| Tibia, mid-shaft                 |               |               |
| TV Density (mg/cm <sup>3</sup> ) | 311.5 ± 11.6  | 311.3 ± 22.4  |
| BV Density (mg/cm <sup>3</sup> ) | 757.2 ± 39.8  | 764.7 ± 34.2  |
| TV (mm <sup>3</sup> )            | 0.025 ± 0.001 | 0.025 ± 0.001 |
| BV (mm <sup>3</sup> )            | 0.013 ± 0.001 | 0.012 ± 0.001 |
| TV/BV                            | 0.511 ± 0.008 | 0.508 ± 0.027 |

The values are the mean ± SEM (n=7 per group)

Supplementary Figure 1

Color image of Fig. 6A

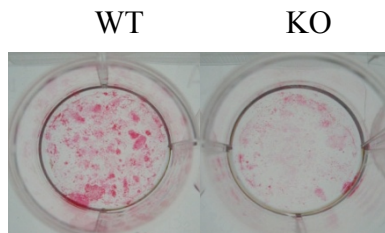

Color image of Fig. 7A

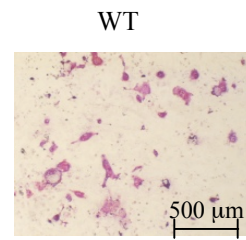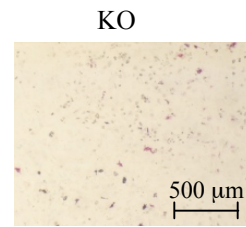

Color image of Fig. 6D

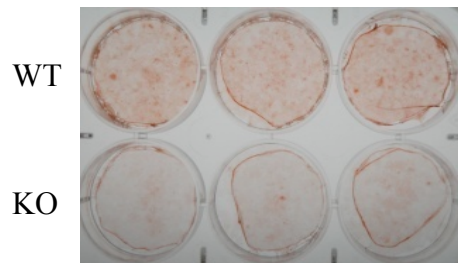

Supplement: supp_M109.001354_jbc.M109.001354-1.pdf [file supp_M109.001354_jbc.M109.001354-1.pdf]
